# Supplementary material
Source: PubMed Central journal article supplement (PMC6214669)
Supplement: NIHMS993169-supplement-1.pdf [file NIHMS993169-supplement-1.pdf]

**Molecular Cell, Volume 71**

**Supplemental Information**

**Architectural Proteins and Pluripotency Factors  
Cooperate to Orchestrate the Transcriptional  
Response of hESCs to Temperature Stress**

**Xiaowen Lyu, M. Jordan Rowley, and Victor G. Corces**

## **SUPPLEMENTAL INFORMATION**

Architectural proteins and pluripotency factors cooperate to orchestrate the transcriptional response of hESCs to temperature stress

Xiaowen Lyu<sup>1</sup>, M. Jordan Rowley<sup>1</sup>, and Victor G. Corces<sup>1</sup>

Figure S1. Related to Figure 1

Figure S2. Related to Figure 2 and Figure 3

Figure S3. Related to Figure 3

Figure S4. Related to Figure 4

Figure S5. Related to Figure 5

Figure S6. Related to Figure 6

Figure S7. Related to Figure 7

Table S1

Table S2

## SUPPLEMENTAL FIGURES

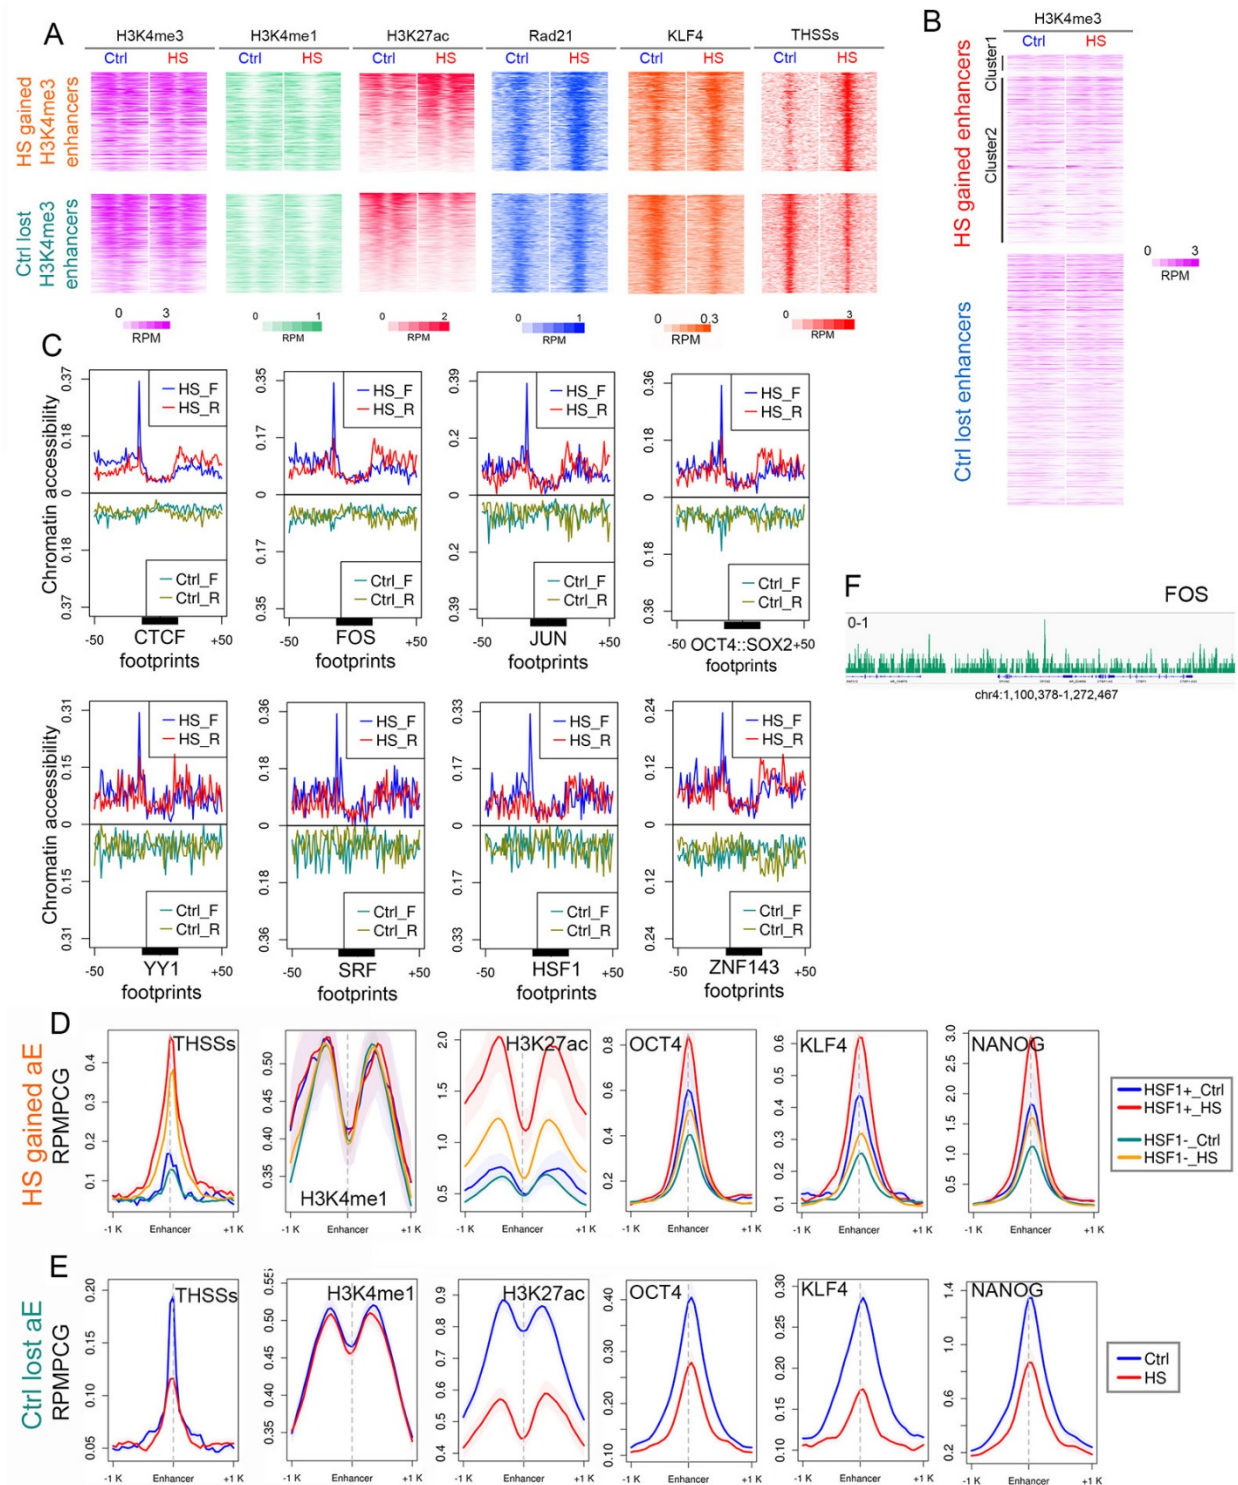

**Figure S1. Related to Figure 1.**

(A) Heatmaps showing changes induced after temperature stress for H3K4me3, H3K4me1, H3K27ac, RAD21, KLF4, and ATAC-seq THSSs, at HS gained enhancers defined based on the

presence of H3K4me3 ChIP-Seq signals  $\pm 1$  kb of enhancer summit (upper panels). Changes of the same features at Ctrl lost enhancers are shown in the lower panels. RPM: reads per million per 50 bp bin.

(B) Heatmaps showing changes in H3K4me3 at enhancers defined in Figure 1C based on the presence of H3K4me1 at HS gained enhancers based on ChIP-Seq signals  $\pm 1$  kb of enhancer summit (upper panels). Changes of H3K4me3 at Ctrl lost enhancers are shown in the lower panels. RPM: reads per million per 50 bp bin.

(C) Analysis of transcription factor motifs found at enhancers activated after temperature stress. Average profiles of ATAC-seq signal (<115 bp) at TF motifs show gain of footprints after temperature stress.

(D) Average profiles of ChIP-seq signals for ATAC-seq THSSs, H3K4me1, H3K27ac, OCT4, KLF4, and NANOG at HSF1+ and HSF1- HS-gained enhancers. RPMPCG: reads per million per 50 bp covered bin. Shading indicates 95% confidence intervals estimated by non-parametric bootstrapping.

(E) Average profiles of ChIP-Seq signals for ATAC-seq THSSs, H3K4me1, H3K27ac, OCT4, KLF4, and NANOG at enhancers that become decommissioned after temperature stress.

RPMPCG: reads per million per 50 bp covered bin.

(F) Example of FOS ChIP-seq signal at a random genomic region.

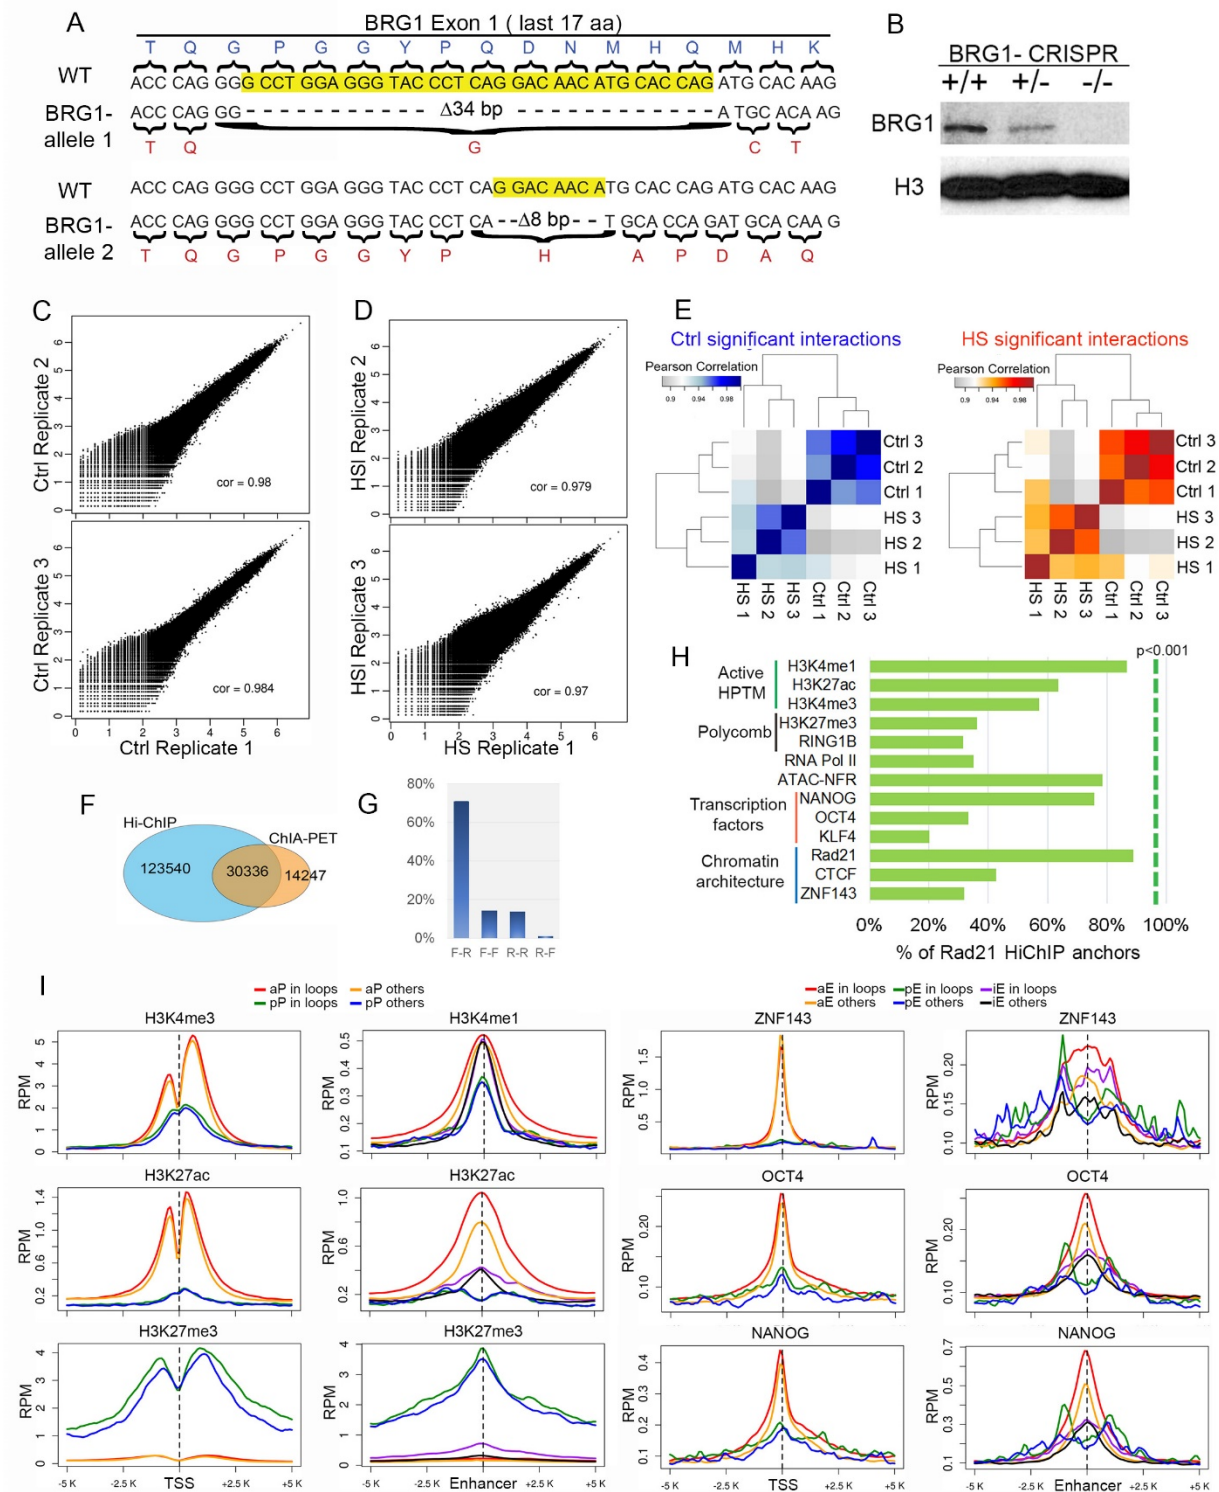

**Figure S2. Related to Figure 2 and Figure 3.**

(A) Diagram showing BRG1<sup>-/-</sup> frameshift mutations in exon 1 obtained by CRISPR in both alleles and the corresponding translated products.

(B) Western blot confirming depletion of BRG1 in mutant cells.

- (C) Scatter plots showing Pearson's correlation of three biological replicates of Ctrl RAD21 HiChIP libraries of H9 hESCs. Interaction reads in 10 kb bins are log transformed.
- (D). Scatter plots showing Pearson's correlation of three biological replicates of HS RAD21 HiChIP libraries. Interaction reads in 10 kb bins are log transformed.
- (E) Clustered heatmaps showing Pearson's correlation of interactions reads density in 10 kb bins of all Ctrl and HS biological replicates on Ctrl and HS significant interactions. Clustering method is hierarchical complete linkage.
- (F) Venn diagram showing overlap of significant interactions from Rad21 HiChIP and published Rad21 ChIA-PET. Rad21 ChIA-PET is from WIBR2 hESCs.
- (G) Ratio of CTCF motif orientations in all CTCF/cohesin loops.
- (H) Percentage of Rad21 HiChIP anchors overlapping with distinct chromatin states and proteins based on ChIP-seq data. Dashed lines indicate significant p values over random genome background.
- (I) Related to Figure 3. Average profiles of different proteins at promoters and enhancers complementing those shown in Figure 3F. RPM: reads per million per 50 bp bin.

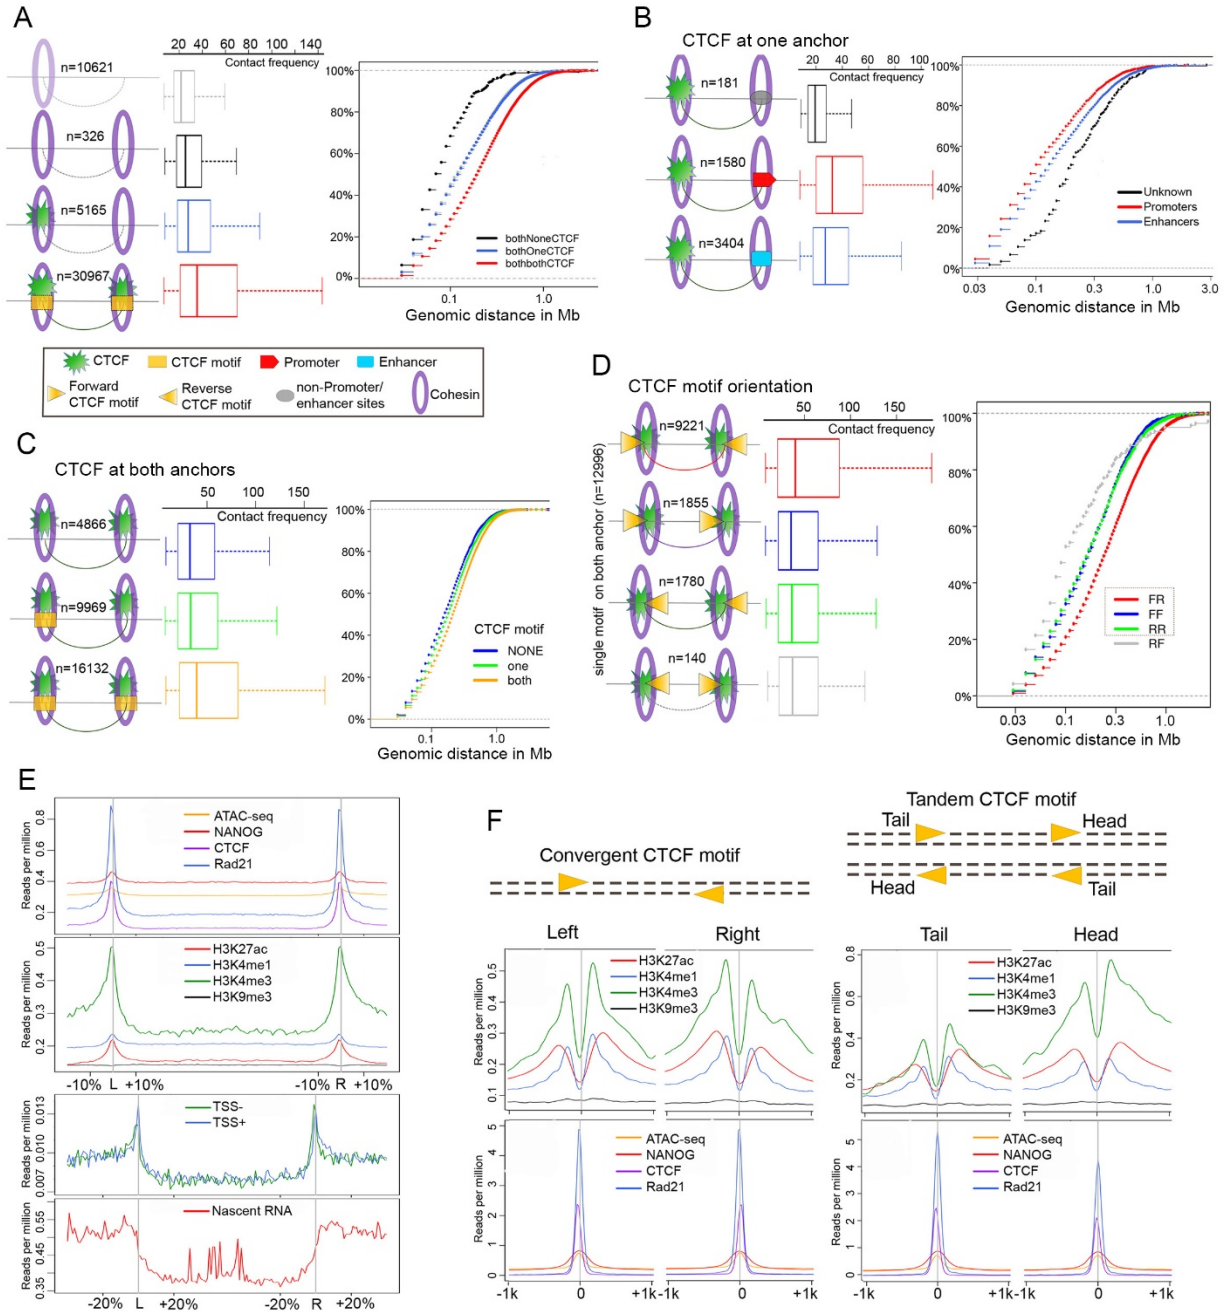

**Figure S3. Related to Figure 3.**

(A) Statistical analyses of cohesin loops with CTCF on neither, either or both anchors. Contact strength and genomic span for each group of loops are also compared based on Rad21 HiChIP. Loops were called using HiCCUPS.

(B) Number of CTCF loops in (A) with enhancers or promoters at the other anchor. Contact strength and genomic span for each group of loops are also compared based on Rad21 HiChIP.

(C) Number of CTCF loops in (B) with CTCF motifs on neither, either or both anchors. Contact strength and genomic span for each group of loops are also compared based on Rad21 HiChIP.

(D) Summary of CTCF motif orientations at CTCF loop anchors in (C). Contact strength and genomic span for each group of loops are also compared based on Rad21 HiChIP.

(E) Average profiles of ChIP-Seq of NANOG, H3K4me3, H3K4me1, H3K9me3, and H3K27ac, CHIP-Nexus of CTCF and Rad21, ATAC-seq NFR reads, annotated gene TSSs on both strands, and nascent RNA sequencing data obtained by EU-seq on size-scaled CTCF-CTCF loops. Regions -20% and +20% scaled relative to loop span are also included.

(F) Zoomed in view of CTCF anchors  $\pm 2$  kb of CTCF-CTCF loops. Schematics of CTCF motif orientation at loop anchors are plotted on top of average profiles of data used in (E).



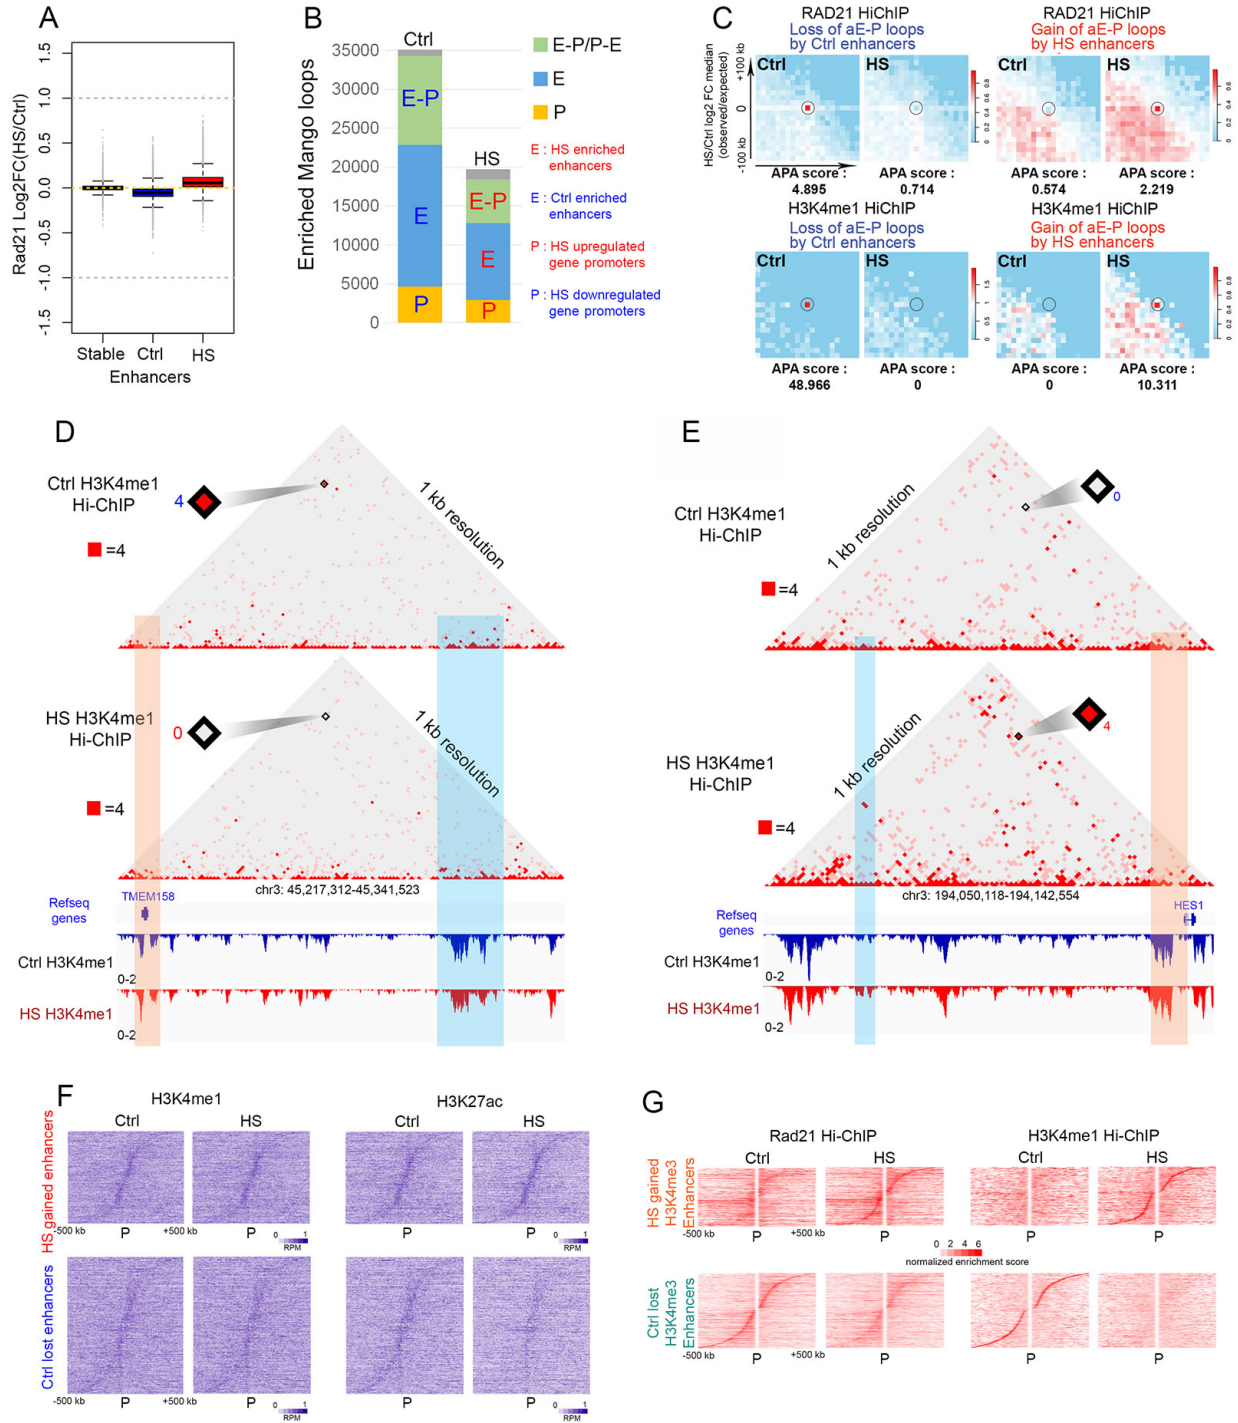

**Figure S4. Related to Figure 4.**

(A) Box plots comparing signal changes in Rad21 ChIP-seq between Ctrl and HS on Stable, Ctrl-enriched and HS-enriched enhancers shown in Figure 1C. Log<sub>2</sub>FC: fold changes in log<sub>2</sub>.  
 (B) Bar plot showing the number of Ctrl enriched RAD21 loops mediating contacts enriched in enhancers and promoters in Ctrl cells, and of HS enriched RAD21 loops mediating contacts enriched in enhancers and promoters in HS cells.  
 (C) APA metaplots showing HS-induced loss of aggregate signal on all loops between Ctrl lost active enhancers and HS-repressed genes (upper left two) and HS-induced gain of aggregate

signal between HS gained active enhancers and HS-induced genes (upper right two) based on RAD21 HiChIP. Similar effects are observed in APA matrices calculated from H3K4me1 HiChIP. APA matrices are made in 10 kb bin, loop anchors  $\pm$  10 bins (100 kb) regions are shown. APA scores are listed under APA plots. Color scale blue-white-red indicates increase of aggregate signals, red is higher than white, white is higher than blue.

(D) Juicebox view of read-normalized Ctrl and H3K4me1 HiChIP in the same region shown in Figure 4A (chr3: 45,217,312 - 45,341,523) containing the HS-repressed gene TMEM158.

Orange vertical stripe highlights the TMEM158 genic region; blue vertical stripe highlights region containing an enhancer whose interaction is lost after temperature stress (see Figure 4A).

(E) Juicebox view of read-normalized Ctrl and HS H3K4me1 HiChIP on the same region shown in Figure 4B (chr3:194,050,118 - 194,142,554) containing the HS-induced gene HES1. Orange vertical stripe highlights HES1 genic region; blue vertical stripe highlights its gained interacting enhancers in HS (see Figure 4B).

(F) Heatmaps comparing changes in ChIP-seq signal for H3K4me1 and H3K27ac at HS gained and control lost enhancers. Only interactions within 500 kb are plotted. Norm enrich score: VC\_SQRT normalized enrichment score.

(G) Heatmaps comparing changes in virtual 4C view of Rad21 HiChIP and H3K4me1 HiChIP signals between all HS-induced gene promoters and HS gained activated H3K4me3 enhancers (top) and HS-repressed gene promoters and HS decommissioned H3K4me3 enhancers (bottom). These enhancers are defined as described in Figure S1A. Viewpoint: promoters. Dynamic enhancers are ranked by distance from upstream to downstream of promoters. Only interactions within 500 kb are plotted. Norm enrich score: VC\_SQRT normalized enrichment score.

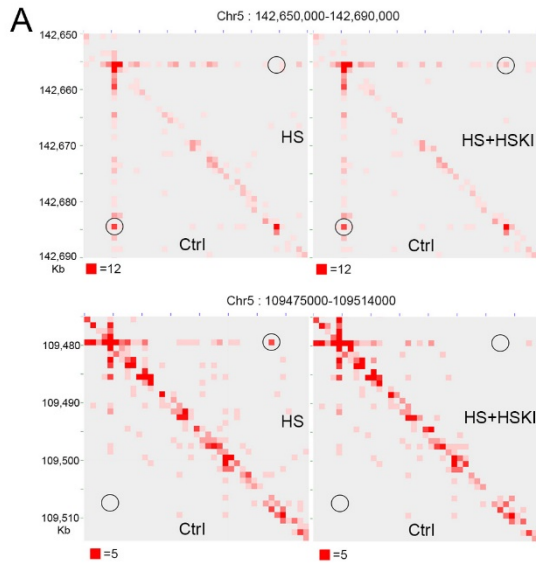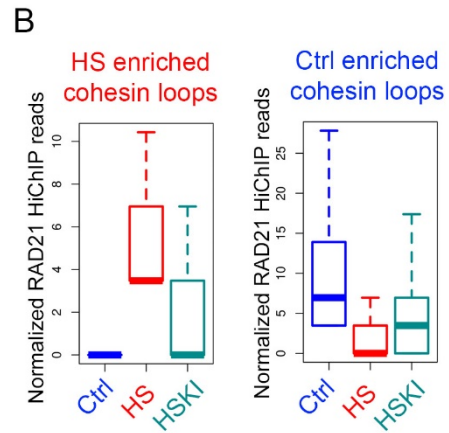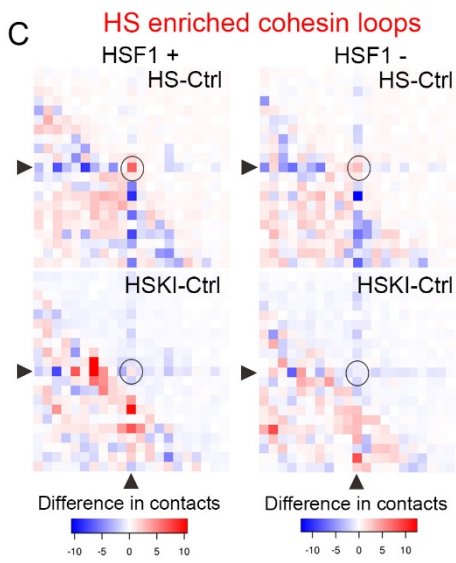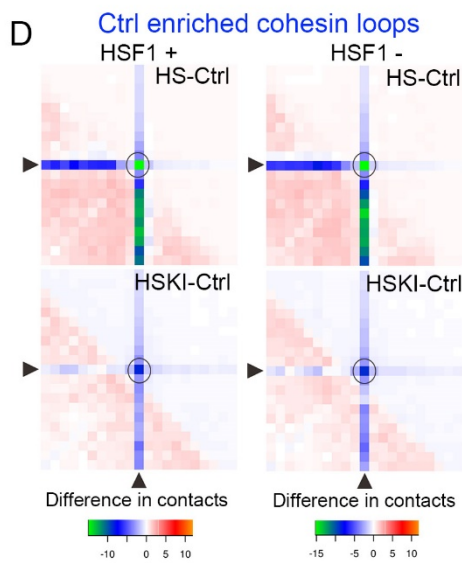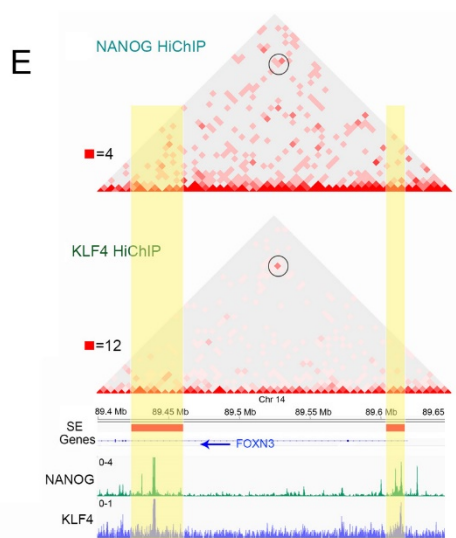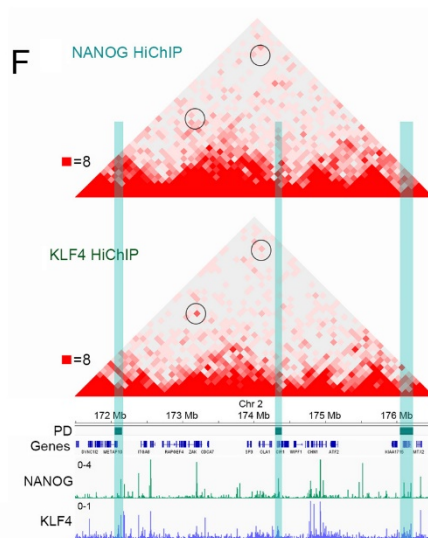

**Figure S5. Related to Figure 5.**

(A) Juicebox browser views of Rad21 HiChIP in Ctrl, HS, and HS+KI in an example region (chr5:141.81-141.855 Mb) containing two Ctrl enriched Rad21 loops (top). A second region (chr5: 109,475,000-109,914,000) containing one HS enriched Rad21 loop (bottom). The HS induced changes are reversed by kinase inhibitors (HSKI).

(B) Boxplots quantifying changes observed in (A).

(C-D) Subtraction metaplots comparing HS-induced changes in Rad21 HiChIP contact frequency on all HS enriched (C) and Ctrl enriched loops (D) associated with HSF1 or not. HS effects are reversed by kinase inhibitors.

(E) NANOG HiChIP in the same region as Figure 5B.

(F) KLF4 HiChIP in the same region as Figure 5C.

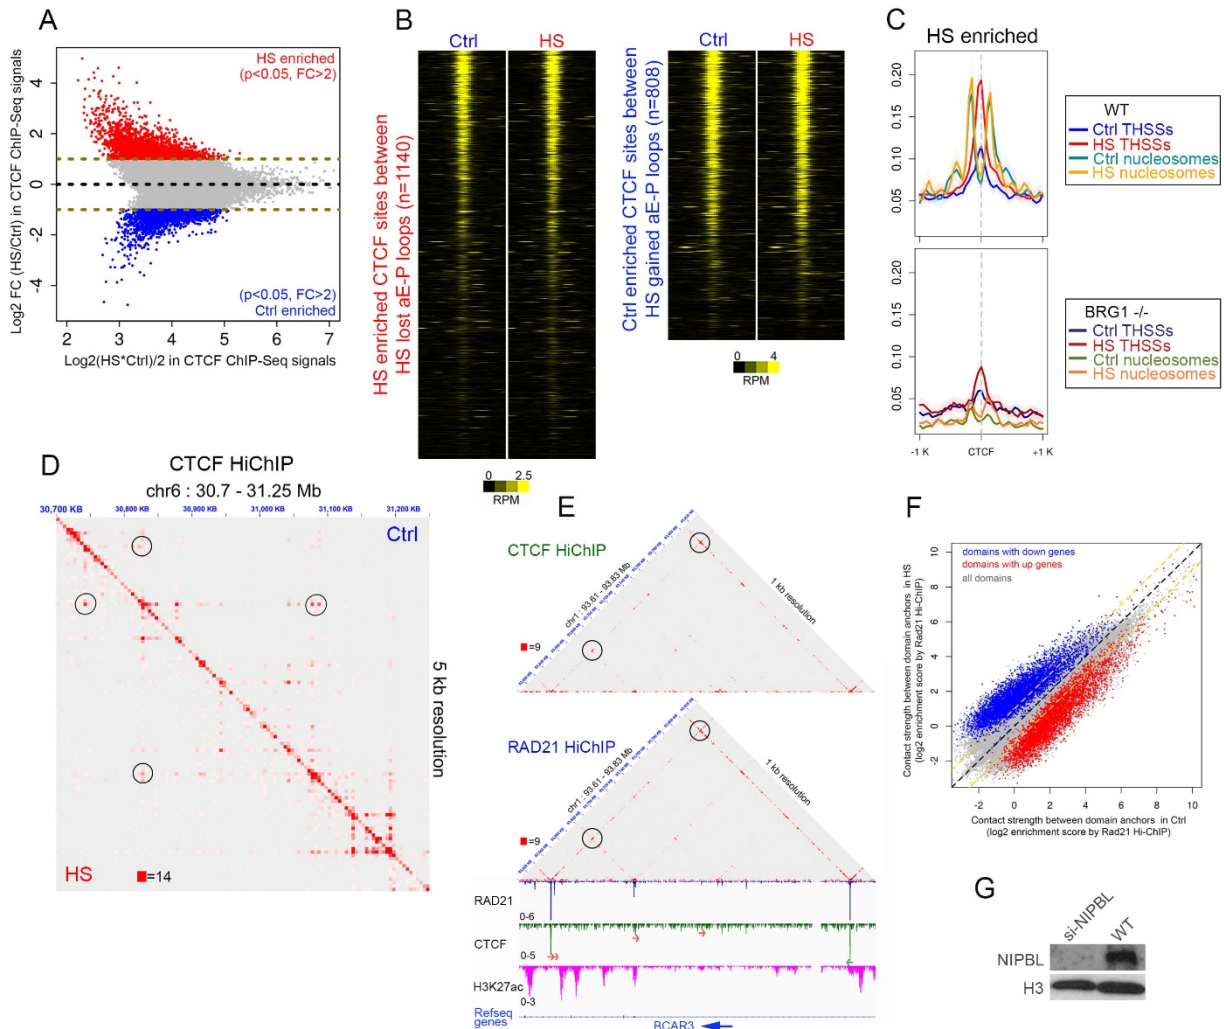

**Figure S6. Related to Figure 6.**

(A) Scatter plots showing MANorm derived CTCF differential peaks in Ctrl and HS cells.

(B) Heatmaps comparing RAD21 ChIP-seq signals in control and temperature-stressed cells at the same CTCF site anchors used in Figure 6A. CTCF summits  $\pm 1$  kb are analyzed. RPM: reads per million per 50 bp bin.

(C) Average profiles of ATAC-seq THSSs and nucleosome signals using the same Y axis as in Figure S1A on HS gained enhancers in HS H9 cells (top) show no repositioning of phased nucleosomes and increased THSSs signals, suggesting increased binding of TFs after temperature stress. BRG1 knockout (bottom) results in absence of phased nucleosomes in both control and temperature stressed cells. Clusters derived by K-means clustering of nucleosomal reads.

(D) Browser view of normalized CTCF HiChIP contact matrices in Ctrl and HS cells showing Ctrl enriched and HS enrich CTCF loops in an example region on chr6.

(E) Comparison of read-normalized Rad21 and CTCF HiChIP in an example region on chr1. Region contains a CTCF loop showing a line indicative of cohesin extrusion. CTCF motif orientations labeled by red and green arrows.

(F) Average profiles comparing ATAC-seq nucleosomal and THSSs signals anchoring on HS enriched CTCF peaks in WT (top) and BRG1<sup>-/-</sup> (bottom) cells. Average signals per 50 bp bin per million reads are plotted.

(G) Western blot confirming the knockdown of NIPBL in H9 cells.

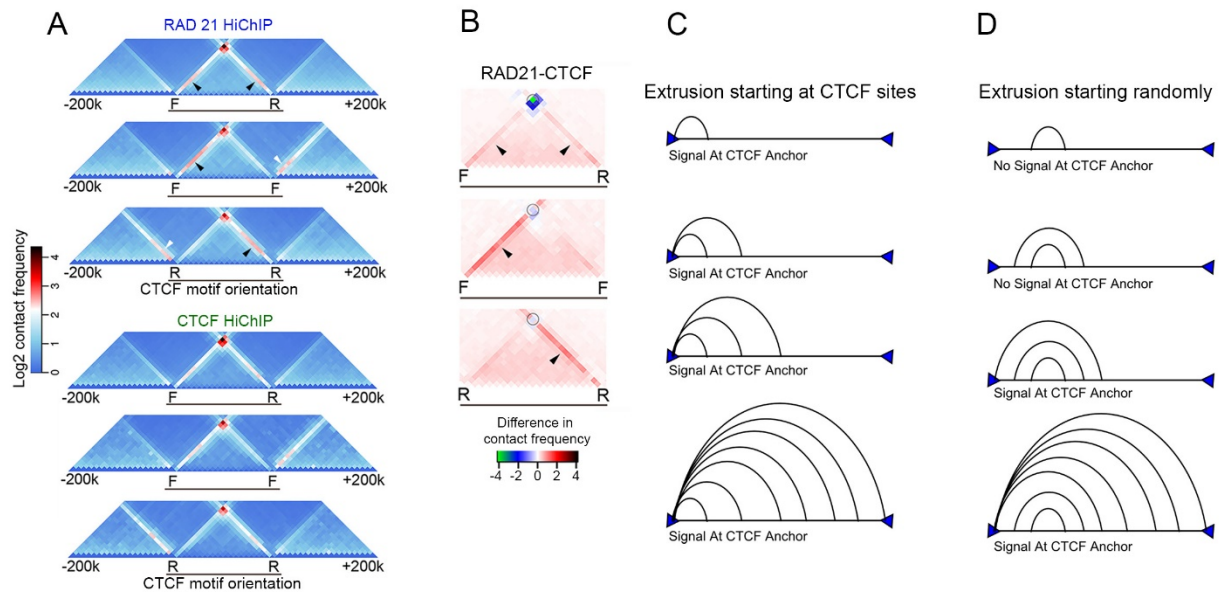

**Figure S7. Related to Figure 7.**

- (A) Metaplots of CTCF HiChIP differ from metaplots of RAD21 HiChIP on F-R, F-F and R-R CTCF loops. Lines in RAD21 HiChIP suggest loop extrusion.
- (B) Subtraction metaplots of RAD21 minus CTCF HiChIP contact frequency more clearly show observations in (A).
- (C) Diagrams showing loop extrusion starting at CTCF sites.
- (D) Diagrams showing loop extrusion starting at random sites.

**Table S1. Summary of read numbers from ChIP-seq, ATAC-seq, and eU-seq experiments. Related to Figures 1, 2 and 6.**

| Experiment Description | Sample Name           | Sequenced Read Pairs | mono-clonal mapped pairs |
|------------------------|-----------------------|----------------------|--------------------------|
| EU-seq                 | H9 EU-seq             | 68,877,895           | 8,765,137                |
| EU-seq                 | HS H9 EU-seq          | 68,115,329           | 22,853,396               |
| ATAC-seq               | fast ATAC-seq Rep1    | 118,170,980          | 32,191,087               |
| ATAC-seq               | fast ATAC-seq Rep2    | 103,318,765          | 23,008,020               |
| ATAC-seq               | HS fast ATAC-seq Rep1 | 81,247,080           | 15,194,305               |
| ATAC-seq               | HS fast ATAC-seq Rep2 | 108,186,505          | 15,305,417               |
| ATAC-seq               | OMNI ATAC-seq         | 77,769,327           | 17,095,650               |
| ATAC-seq               | HS OMNI ATAC-seq      | 88,473,264           | 31,534,550               |
| ATAC-seq               | BRG1-KO_ATAC-seq      | 17,752,435           | 11,631,725               |
| ATAC-seq               | HS BRG1-KO_ATAC-seq   | 16,888,618           | 10,313,058               |
| ChIP-Seq               | RAD21 Rep1            | 18,008,195           | 14,999,514               |
| ChIP-Seq               | RAD21 Rep2            | 40,441,130           | 32,345,219               |
| ChIP-Seq               | HS RAD21 Rep1         | 18,008,554           | 15,159,520               |
| ChIP-Seq               | HS RAD21 Rep2         | 45,266,203           | 34,719,218               |
| ChIP-Seq               | CTCF                  | 14,611,504           | 11,975,865               |
| ChIP-Seq               | HS CTCF               | 28,489,132           | 22,853,316               |
| ChIP-Seq               | ZNF143                | 42,930,894           | 35,069,243               |
| ChIP-Seq               | HS ZNF143             | 32,573,437           | 26,802,009               |
| ChIP-Seq               | RNAPII                | 23,839,421           | 19,220,900               |
| ChIP-Seq               | HS RNAPII             | 25,171,706           | 20,273,270               |
| ChIP-Seq               | RING1B                | 38,529,272           | 31,532,532               |
| ChIP-Seq               | HS RING1B             | 32,724,019           | 26,609,058               |
| ChIP-Seq               | c-FOS                 | 30,423,826           | 24,644,202               |
| ChIP-Seq               | HS c-FOS              | 20,545,510           | 16,734,680               |
| ChIP-Seq               | BRG1                  | 13,614,293           | 11,104,446               |
| ChIP-Seq               | HS BRG1               | 21,401,954           | 17,325,242               |
| ChIP-Seq               | HSF1                  | 21,905,640           | 17,494,660               |
| ChIP-Seq               | HS HSF1               | 34,796,279           | 26,982,685               |
| ChIP-Seq               | HS KI HSF1            | 41,248,763           | 31,975,880               |
| ChIP-Seq               | OCT4                  | 41,424,386           | 32,713,149               |
| ChIP-Seq               | HS OCT4               | 34,247,683           | 26,838,475               |
| ChIP-Seq               | NANOG                 | 34,721,556           | 28,857,399               |
| ChIP-Seq               | HS NANOG              | 34,844,931           | 27,556,217               |
| ChIP-Seq               | KLF4                  | 25,116,739           | 19,589,207               |
| ChIP-Seq               | HS KLF4               | 46,924,739           | 36,421,653               |
| ChIP-Seq               | WAPL                  | 37,162,011           | 30,177,245               |



|            |                    |            |            |
|------------|--------------------|------------|------------|
| ChIP-Seq   | HS WAPL            | 34,798,622 | 28,120,270 |
| ChIP-Seq   | NIPBL              | 39,164,024 | 31,920,922 |
| ChIP-Seq   | HS NIPBL           | 38,010,174 | 30,535,735 |
| ChIP-Seq   | H3K27ac Rep1       | 21,931,006 | 18,430,672 |
| ChIP-Seq   | H3K27ac Rep2       | 10,283,229 | 8,589,901  |
| ChIP-Seq   | HS H3K27ac Rep1    | 18,948,404 | 16,044,560 |
| ChIP-Seq   | HS H3K27ac Rep2    | 8,548,663  | 7,067,164  |
| ChIP-Seq   | H3K27me3           | 43,795,635 | 31,658,020 |
| ChIP-Seq   | HS H3K27me3        | 18,773,542 | 13,153,473 |
| ChIP-Seq   | H3K4me1            | 27,054,510 | 23,897,690 |
| ChIP-Seq   | HS H3K4me1         | 25,919,309 | 22,816,223 |
| ChIP-Seq   | H3K4me3            | 29,282,526 | 22,874,245 |
| ChIP-Seq   | HS H3K4me3         | 24,755,276 | 18,719,781 |
| ChIP-Seq   | BRG1-KO_H3K27ac    | 35,487,611 | 30,504,289 |
| ChIP-Seq   | HS BRG1-KO_H3K27ac | 43,705,297 | 37,438,922 |
| ChIP-Nexus | CTCF               | 60,977,193 | 36,060,441 |
| ChIP-Nexus | HS CTCF            | 74,748,797 | 32,372,622 |
| ChIP-Nexus | RAD21              | 35,345,131 | 7,866,284  |
| ChIP-Nexus | HS RAD21           | 40,556,714 | 8,039,122  |

**Table S2. Summary of quality control steps in the processing of sequencing reads obtained in HiChIP experiments. Related to Figures 3, 4, 5, 6, and 7.**

| Experiment Description    | Sequenced Read Pairs | Unique Read Pairs   | Hi-C Contacts              |
|---------------------------|----------------------|---------------------|----------------------------|
| Rad21 HiChIP Rep1         | 327,840,789          | 159,720,637(48.72%) | 108,201,694(33.00%/67.74%) |
| Rad21 HiChIP Rep2         | 87,010,131           | 58,823,169(67.60%)  | 39,516,875(45.42%/67.18%)  |
| Rad21 HiChIP Rep3         | 124,188,827          | 83,606,395(67.32%)  | 55,755,324(44.90%/66.69%)  |
| Rad21 HiChIP Rep4         | 63,500,514           | 16,073,568(25.31%)  | 10,049,359(15.83%/62.52%)  |
| HS Rad21 HiChIP Rep1      | 250,139,434          | 179,543,527(71.78%) | 114,541,662(45.79%/63.80%) |
| HS Rad21 HiChIP Rep2      | 93,931,067           | 72,090,933(76.75%)  | 47,673,797(50.75%/66.13%)  |
| HS Rad21 HiChIP Rep3      | 149,416,527          | 98,323,089(65.80%)  | 65,807,224(44.04%/66.93%)  |
| HS Rad21 HiChIP Rep4      | 68,920,318           | 28,067,253(40.72%)  | 17,737,471(25.74%/63.20%)  |
| HS KI Rad21 HiChIP        | 119,333,012          | 69,397,925(58.15%)  | 49,721,948(41.67%/71.65%)  |
| CTCF HiChIP Rep1          | 72,198,120           | 31,637,104(43.82%)  | 20,110,198(27.85%/63.57%)  |
| CTCF HiChIP Rep2          | 13,114,778           | 7,831,995(59.72%)   | 5,273,728(40.21%/67.34%)   |
| CTCF HiChIP Rep3          | 41,741,738           | 9,779,254(23.43%)   | 6,345,340(15.20%/64.89%)   |
| HS CTCF HiChIP Rep1       | 74,134,921           | 27,741,206(37.42%)  | 19,557,316(26.38%/70.50%)  |
| HS CTCF HiChIP Rep2       | 46,821,549           | 11,022,872(23.54%)  | 7,107,075(15.18%/64.48%)   |
| OCT4 HiChIP Rep1          | 69,836,551           | 19,246,597(27.56%)  | 11,531,943(16.51%/59.92%)  |
| OCT4 HiChIP Rep2          | 61,118,825           | 23,426,516(38.33%)  | 14,326,685(23.44%/61.16%)  |
| HS OCT4 HiChIP Rep1       | 83,732,380           | 45,540,789(54.39%)  | 30,913,480(36.92%/67.88%)  |
| HS OCT4 HiChIP Rep2       | 70,234,334           | 19,425,828(27.66%)  | 11,753,151(16.73%/60.50%)  |
| NANOG HiChIP Rep1         | 100,382,818          | 68,276,347(68.02%)  | 47,127,026(46.95%/69.02%)  |
| NANOG HiChIP Rep2         | 4,057,332            | 3,292,918(81.16%)   | 1,966,789(48.47%/59.73%)   |
| HS NANOG HiChIP Rep1      | 92,153,040           | 62,986,031(68.35%)  | 43,644,215(47.36%/69.29%)  |
| HS NANOG HiChIP Rep2      | 5,473,361            | 4,640,723(84.79%)   | 2,662,956(48.65%/57.38%)   |
| KLF4 HiChIP Rep1          | 121,964,602          | 54,776,012(44.91%)  | 30,245,124(24.80%/55.22%)  |
| KLF4 HiChIP Rep2          | 8,849,661            | 7,040,063(79.55%)   | 3,770,032(42.60%/53.55%)   |
| HS KLF4 HiChIP            | 92,095,681           | 57,369,824(62.29%)  | 29,653,453(32.20%/51.69%)  |
| H3K4me1 HiChIP Rep1       | 53,487,872           | 30,661,397(57.32%)  | 19,331,303(36.14%/63.05%)  |
| H3K4me1 HiChIP Rep2       | 82,380,337           | 40,438,143(49.09%)  | 25,289,140(30.70%/62.54%)  |
| HS H3K4me1 HiChIP Rep1    | 96,801,462           | 31,396,227(32.43%)  | 19,622,945(20.27%/62.50%)  |
| HS H3K4me1 HiChIP Rep2    | 112,042,918          | 35,105,011(31.33%)  | 21,773,542(19.43%/62.02%)  |
| siNIPBL HS CTCF HiChIP    | 56,100,419           | 17,040,451(30.37%)  | 8,819,287(15.72%/51.76%)   |
| siNIPBL HS H3K4me1 HiChIP | 74,434,067           | 62,070,947(83.39%)  | 36,004,478(48.37%/58.01%)  |
